1 **Head-Direction drift in rat pups is consistent with an angular path-**  
2 **integration process**

3 **Abbreviated title (50 character maximum)** Head-Direction drift in rat pups

4

5 Gilad Tocker<sup>\*1,2</sup>, Eli Borodach<sup>\*1</sup>, Tale L. Bjerknes<sup>3</sup>, May-Britt Moser<sup>3</sup>, Edvard I. Moser<sup>3</sup>, Dori  
6 Derdikman<sup>1</sup>

7 <sup>1</sup>*The Rappaport Faculty of Medicine and Research Institute, Technion – Israel Institute of*  
8 *Technology, Bat Galim, Haifa 31096, Israel*

9 <sup>2</sup>*The Gonda Brain Research Center, Bar Ilan University, Ramat-Gan, Israel 52900*

10 <sup>3</sup>*Kavli Institute for Systems Neuroscience, Norwegian University of Science and Technology,*  
11 *7489 Trondheim, Norway*

12 *\*Equal contribution*

13

14 *Corresponding Author:*

15 Dori Derdikman

16 The Rappaport Faculty of Medicine and Research Institute

17 Technion – Israel Institute of Technology,

18 Bat Galim, Haifa 31096, Israel

19 [derdik@technion.ac.il](mailto:derdik@technion.ac.il)

20

21

## 22 **Summary**

23  
24 The sense of direction is a vital computation, whose neural basis is considered to be carried out  
25 by head-direction cells. One way to estimate head-direction is by integrating head angular-  
26 velocity over time. However, this process results in error accumulation resembling a random  
27 walk, proportional to  $\sqrt{t}$ , which constitutes a mark for a path integration process. In the present  
28 study we analyzed previously recorded data to quantify the drift in head-direction cells of rat  
29 pups before and after eye-opening. We found that in rat pups before eye-opening the drift  
30 propagated as a random walk, while in rats after eye-opening the drift was lower. This suggests  
31 that a path-integration process underlies the estimation of head-direction, such that before eye-  
32 opening the head-direction system runs in an open-loop manner and accumulates error. After  
33 eye-opening, visual-input, such as arena shape, helps to correct errors and thus compute the  
34 sense of direction accurately.

## 35 **Introduction**

36 The sense of orientation is a vital computation, widespread in many animal species  
37 (Muller & Wehner 1988; Seelig & Jayaraman 2015). In mammals, the neural basis underlying  
38 orientation is considered to be carried out by head direction cells, which are cells that fire when  
39 the animal's head points to a specific direction (Robertson et al. 1999; Finkelstein et al. 2016;  
40 Taube et al. 1990a; Taube et al. 1990b; Ranck 1985). The lack of specific sensors for head  
41 direction in mammals suggests that the brain infers the animal's head direction indirectly from  
42 various sensory inputs. Previous studies showed that vestibular inputs are necessary for the  
43 formation of the head direction signal while visual inputs are important for anchoring the head  
44 direction signal to the external reference frame (Bjerknes et al. 2015; Tan et al. 2015; Muir et al.  
45 2009; Valerio & Taube 2016; Taube et al. 1990b; Goodridge et al. 1998; Stackman & Taube  
46 1997). However, the algorithm used by the brain to compute the animal's head direction is  
47 unknown. One possible way to compute the head direction signal is by integrating the head's  
48 angular velocity over time (Zhang 1996). If the noise source in such an integration process is  
49 uncorrelated and stationary, this process will result in accumulation of an error proportional  
50 to  $\sqrt{t}$  (because of its resemblance to Brownian motion). Therefore, a head direction drift  
51 proportional to  $\sqrt{t}$  would be a mark for an angular path integration algorithm underlying the head

52 direction system. Yet, it is difficult to measure the drift in adult rats because their head  
53 directionality remains stable for long periods of time even in the dark (Chen et al. 2016;  
54 Goodridge et al. 1998). Bjercknes et al. (2015) found that head-direction cells exist without visual  
55 input in rat pups before eye opening already at P13, but that their preferred directional tuning is  
56 unstable. This instability makes them a natural model for studying the drift of the head direction  
57 system.

58 In the present study we aimed to quantify the cell's head direction drift in rat pups before and  
59 after eye opening. We found that in rats before eye opening accumulation of drift resembled the  
60 power law expected out of an angular path integration process. In contrast, in rats after eye  
61 opening, the accumulation of drift was lower than expected.

62 We furthermore checked how environmental shape affected head direction drift. A square  
63 environment has a 4-fold rotational symmetry, while a circular environment has an infinite-fold  
64 rotational symmetry. Therefore, a square environment bares more information about the rat's  
65 head direction. We found that the magnitude of the drift was dependent on the geometrical shape  
66 of the environment. Together, our findings support a vestibular-dependent angular path-  
67 integration algorithm, whose error accumulates over time, which can be corrected by vision.  
68 Furthermore, the rat uses the environment's geometrical shape to correct this accumulated error.  
69

## 70 **Material and Methods**

### 71 *Subjects*

72 For the analysis of rat pups we used previously published data from Bjercknes et al. (2015). A  
73 total of 163 cells were recorded from 14 rats. 131 of these cells were recorded twice. 86 cells  
74 were recorded in a circular arena during the last 3-4 days before eye-opening (P11-P13). 62 of  
75 these cells were recorded twice. Recordings were done on P11 in one rat, P12 in three rats, P13  
76 in six rats, P14 in eight rats, and P15 in one rat. 52 cells were recorded in a circular environment  
77 1-2 days after eye-opening. 49 of these cells were recorded twice. Recordings were done on P14  
78 in one rat, P15 in eight rats and P16 in 6 rats. 25 cells were recorded in a square environment 1-2  
79 days after eye-opening. 20 of these cells were recoded twice. Recordings in a square  
80 environment were done on P15 in two rats and on P16 in two rats. The tetrodes were placed in  
81 presubiculum in seven rats, in parasubiculum in four rats, at the border between pre- and

82 parasubiculum in two rats, and in medial entorhinal cortex (MEC) in one rat. The tetrodes were  
83 distributed across deep and superficial layers of pre- and parasubiculum and deep layers of MEC.  
84 The pups moved freely across the recording arena and covered the entire range of head  
85 directions. For the analysis of the adult groups we used previously published data from  
86 (Sargolini et al. 2006; Bonnevie et al. 2013; Derdikman et al. 2009). A total of 408 head-  
87 direction cells were analyzed. All cells were recorded from the MEC. 93 of these cells were  
88 recorded in a circular environment. 315 cells were recorded in a square environment.

89

### 90 *Head Directionality*

91 Head direction tuning curves were generated by dividing the number of spikes fired when the rat  
92 faced a particular direction (in bins of  $6^\circ$ ) by the total amount of time the rat spent facing that  
93 direction. The resulting tuning curve was then smoothed using a 10-point hamming window. The  
94 strength of head directionality was estimated by computing the length of the mean vector  
95 (Rayleigh vector) for the circular distribution of the tuning curve.

96

### 97 *Classification of head direction cells*

98 Classification of head direction cells was done by determining the significance of the cell's head  
99 directionality, using a shuffling procedure. The null hypothesis was that the head directionality  
100 of the cell was not caused by a dependence of the cell's firing rate on the rat's head direction  
101 during the session. Therefore, for each cell, the whole time series of spikes was shifted in time by  
102 a random (uniformly-distributed) interval between 0 and the time length of the session (600  
103 seconds). Spikes which were out-bounded were rotated cyclically to the beginning. This  
104 procedure preserved the temporal structure of the cell's spiking activity and the rat's head  
105 direction behavior during the session, but dissociated between the two. We repeated this process  
106 100 times for each cell. If the Rayleigh vector of a cell was longer than the 95<sup>th</sup> percentile of the  
107 shuffled cells Rayleigh vectors distribution, the null hypothesis was rejected, meaning that the  
108 head directionality of the cell was most likely due to the cell firing at a specific head direction of  
109 the rat. Cells that passed this significance threshold were classified as head direction cells in our  
110 study.

111

## 112 *Quantifying the cell's drift*

113 To quantify the cell's drift we first calculated for each pair of spikes in the spike train, (1) the  
114 time interval between the spikes ( $\Delta T$ ) and, (2) the head direction difference between the spikes  
115 ( $\Delta HD$ ). Then, we partitioned the  $\log(\Delta T)$   $\log(\Delta HD)$  space into bins of  $0.1 \times 0.1$   
116  $\log(\text{sec})\log(\text{degrees})$  and counted the number of spike-pairs in each bin. We subsequently  
117 smoothed the histogram using a Gaussian kernel with a standard deviation of  $\sigma = 1.5$  cm.  
118 Finally, we divided the number of spike-pairs in each bin by the total amount of spikes pair-  
119 sharing the same  $\log(\Delta T)$ -reading, to create a probability function of  $\log(\Delta HD)$  given  $\log(\Delta T)$ .  
120 We then fit a regression line (slope and intersection) between all  $\log(\Delta T)$  values and the most  
121 probable  $\log(\Delta HD)$  values that corresponded to them.

$$\log(\Delta HD) = a \cdot \log(\Delta T) + b$$

122 where  $a$  is the slope and  $b$  is the intersection. We ignored  $\Delta T$  smaller than 2 sec.

123

## 124 *Evaluating the drift significance of population of cells*

125 To evaluate the significance of the drift across the whole cell population, a shuffling procedure  
126 was used. The null hypothesis was that the temporal structure of the cell's spiking activity was  
127 independent from the rat's behavior. Therefore, the whole series of spikes was shifted in time by  
128 a random (uniformly-distributed) interval between 0 seconds and the length of a single session  
129 (600 seconds). Spikes which were out-bounded were rotated cyclically to the beginning. For  
130 each shuffled cell, we calculated the cell's drift in a similar manner to the calculation used for the  
131 real cell, and then we fitted a regression line (slope and intersection) similar to that described in  
132 the previous section. We repeated this process 1000 times for each cell. The median slope and  
133 intersection of the original population was then compared to the distributions of median slopes  
134 and median intersections of the shuffled populations.

## 135 *Simulating cells*

136 To simulate head direction cells with no drift, we simulated non-homogeneous Poisson cells. At  
137 each millisecond  $t$ ,  $\lambda(t)$  was chosen as the value of the bin in a Gaussian head direction tuning  
138 curve that was closest to the instantaneous head direction of the rat. The Gaussian head direction  
139 tuning curve function was:

$$G(x) = a \cdot e^{\frac{-(x-b)^2}{c^2}} + d$$

140 Parameters  $a=15$ ,  $c=50$  and  $d=0.2$  were selected by fitting a Gaussian function to a representative  
141 head direction cell of an adult rat with no drift (results did not changed significantly after fitting  
142 Gaussian to a different cell). Parameter  $b$  which is the preferred head direction of the cell was  
143 selected randomly from a uniform distribution between 0 and 360.

144 To simulate drifting head direction cells, we simulated the head directionality as in the  
145 simulation of head direction cells with no drift. The insertion of drift was done by shifting the  
146 Gaussian head direction tuning curve at each time step (1 millisecond) randomly by  $\varepsilon$  degrees  
147 either to the left or to the right. Values of the Gaussian distribution that drifted beyond  $360^\circ$   
148 were wrapped cyclically to the beginning. The simulation of the non-cyclic drift was done by  
149 allowing the Gaussian head direction tuning curve to drift beyond the  $360^\circ$  bound.  $\lambda(t)$  was  
150 chosen as the bin in the Gaussian distribution that was closest to the instantaneous head direction  
151 of the rat, modulo 360. Note that the cells were drifting continuously during the simulation and  
152 there was no correction mechanism.

153 Choosing  $\varepsilon$  values: we tested several different values of  $\varepsilon$  (0, 0.2, 0.4, 0.6, 0.8, 1).  $\varepsilon=0$  is a  
154 simulation of head direction with no drift. We chose  $\varepsilon=1$  to be our drift upper limit because in  
155 this case 87% of the cells do not show significant head directionality (Figure 1E, F). Meaning  
156 that the cells lose their head directionality in this levels of drift. If this was the case in the real  
157 recorded data we could not have detected these head direction cells. However, in the real data we  
158 did find head direction cells (51% of all recorded cells passed the head directionality criteria).

159 To simulate non-head directions cells, we simulated homogeneous Poisson cells.  $\lambda$  was chosen  
160 to be 4. The results did not change significantly when using a different  $\lambda$  (2, 3, 6 – data not  
161 shown).

162 For all simulations, we used a trajectory of a rat pup at P14 running in a circular environment.

163

164

## 165 **Results**

### 166 *Simulation of cells*

167 We started investigating the drift of head direction cells, by first asking what would be the  
168 expected head direction drift of 3 different kinds of cells: (1) head direction cells with no drift  
169 (Figure 1A) (2) non-head direction cells, meaning Poisson cells with constant  $\lambda$  along the session  
170 (Figure 1B), and (3) head direction cells with drift (Figure 1C, D). We simulated 100 cells of  
171 each kind and quantified their drift. Accumulated noise proportional to  $\sqrt{t}$  is the theoretical  
172 characteristic of an iterative process with zero mean noise, which should behave like Brownian  
173 motion. However, the cyclic nature of head direction variable can cause an underestimation of  
174 this drift. To address this issue, we simulated the head directionality drift of cells by two  
175 different methods. In the first method, we used head direction as a non-cyclic variable, meaning  
176 that the drifted head direction could grow beyond 360 degrees (Figure 1C). In the second  
177 method, we used head direction as a cyclic variable between 0 and 360 degrees as in the real life  
178 data (Figure 1D). Note that in both methods the head direction cells were drifting continuously  
179 without any correction mechanism (see Material and Methods). Quantification of drift was done  
180 by first computing (1) the time interval between all spike pairs of the cell ( $\Delta T$ ), and (2) the head  
181 direction difference between these spike pairs ( $\Delta HD$ ), second, normalizing the spike pairs into  
182 conditional probability of  $\log \Delta HD$  given  $\log \Delta T$ , and lastly fitting a regression line between  $\log$   
183  $\Delta T$  and the most probable  $\log \Delta HD$  (see Materials and Methods).

### 184 *Drift quantification results of simulated cells*

185 We found that the median log-drift slope of the simulated head direction cells with no drift was  
186 close to zero:  $0.0534 \pm 0.03$  as expected (Figure 1A, G). The log-drift slope of the simulated  
187 Poisson non-head direction cells was  $0.065 \pm 0.002$ . The small log-slope of the drift was a result  
188 of the Poisson nature of these cells (Figure 1B, G). The median intersection of non-head  
189 direction cells was significantly higher than the median intersection of head direction cells  
190 ( $88 \pm 1$ ,  $37 \pm 1$ ,  $p < 10^{-34}$ ; Wilcoxon Ranksum test, Figure S1A).

191 The median log-drift slope of drifting cells in the non-cyclic simulation method was close to 0.5  
192 for drift higher than 0.6 degrees per msec ( $0.4515 \pm 0.0269$ ,  $0.4744 \pm 0.0381$ , and  $0.51 \pm$   
193  $0.0663$  for drifts 0.6, 0.8, and 1 degree per msec) (Figure 1E) as expected from a diffusion-like  
194 process (Figure 1C, G). In contrast, the median log-drift slope in the cyclic simulation method

195 was lower ( $0.3079 \pm 0.0065$  was the highest for 0.6 degrees per msec drift) (Figure 1D, E, G).  
196 The lower values of the cyclic case was a result of the cyclic variable tending to reduce large  
197 values of drift. Thus, we expect head direction drift originating from an iterative processes to  
198 have a maximum error accumulation slope of about  $\sim 0.3$ .

### 199 *Drift quantification results of head directions cells in rat pups*

200 After we simulated a population of cells and found the expected drift of each kind of cell, as  
201 described above, we continued and applied the same methods to real recorded head direction  
202 cells, and asked how their drift meets our predictions from simulation. We analyzed 294  
203 previously recorded cells from Bjercknes et al. (2015). Cells were recorded from the pre- and  
204 para- subiculum of 14 rat pups while they moved freely in the arena. Pre-eye-opening cells were  
205 recorded on P11-P14. Post-eye-opening cells were recorded on P15-P16. Cells were classified as  
206 head direction cells if their Rayleigh vector length was longer than the 95<sup>th</sup> percentile of a  
207 shuffled distribution. 152 out of 294 cells passed this criterion and therefore were defined as  
208 head direction cells and were included in further analysis.

209 The head directionality of many of the cells in rat pups drifted over time (Figure 2B-E). We thus  
210 aimed at measuring the gradual accumulation of drift, in rats before eye-opening vs. after eye-  
211 opening. We analyzed 56 cells recorded in rat pups before eye-opening (P11-P14) and 60 cells  
212 recorded in rat pups after eye opening (P15-P16). All cells were recorded while rat pups were  
213 foraging for food in a circular environment. The median log-slope of cells recorded from rat pups  
214 before eye opening was  $0.3098 \pm 0.0265$ , significantly higher ( $p < 10^{-4}$ ; Wilcoxon Ranksum test)  
215 than the drift in rat pups after eye opening, which had a log-slope of  $0.1256 \pm 0.0238$  (Figure  
216 2F). In adult rats the slope was small (log-slope= $0.0774 \pm 0.0101$ ) (Figure 2F). There was no  
217 significant difference between the drift log-slope in rat pups before eye-opening and the  
218 maximum drift log-slope of simulated drifting cells ( $\epsilon = 0.6$  degree per msec drift,  $p = 0.9228$ ;  
219 Wilcoxon Ranksum test) (Figure 2G). In contrast, the drift log-slope after eye-opening was  
220 significantly lower than the drift log-slope of simulated drifting cells (Figure 2G,  $p < 10^{-5}$ ;  
221 Wilcoxon Ranksum test).

222 We applied a shuffling procedure on all cells to check if the drift we found was merely an artifact  
223 of the rat's behavior and of the independent spiking activity. The median log-drift slope of cells  
224 of rats before eye-opening and after eye-opening was significantly higher than of the shuffled



225 distribution ( $p < 0.01$ ) (Figure 2F), suggesting that the rat's behavior alone could not account for  
226 the drift.

### 227 *Environmental geometry affects the cell's drift*

228 We next asked whether the environment's geometry affects the cells' drift. We analyzed a  
229 population of 35 cells recorded from rats-pups after eye opening foraging for food in a square  
230 environment together with 315 cells from adult rats foraging for food in a square environment,  
231 and compared them to 60 cells that were recorded in rats-pups after eye-opening foraging for  
232 food in circular environment together with 93 adult rats foraging for food in circular  
233 environment. We found that the drift, when rats ran in a square environment, was significantly  
234 lower (slope= $0.0271 \pm 0.0065$ ) than the drift when rats ran in a circular environment (Figure 3)  
235 (slope= $0.0857 \pm 0.0117$ ,  $p < 10^{-9}$ ; Wilcoxon Ranksum test).

236

## 237 **Discussion**

238 In the present study we found that the head direction drift in rats before eye opening  
239 (P13-14) followed a power law of  $\sim t^{0.31}$ , while in rats after eye opening (P15-16) it followed a  
240 power law of  $\sim t^{0.12}$ . The accumulation of drift in rats before eye opening resembled the power  
241 law expected out of an angular path integration process, and in rats after eye opening was lower  
242 than expected. In rats after eye opening and adults the drift in a square environment was smaller  
243 than in a circular environment.

244 Many theoretical studies proposed that the head direction signal was computed by an angular  
245 path integration process, therefore drifting and accumulating error over time (Skaggs et al. 1995;  
246 Redish et al. 1996; Zhang 1996). However, Although experimental work has shown that the  
247 preferred tuning direction of head direction cells changed when the rat was devoid of visual input  
248 (Bjerknes et al. 2015; Goodridge et al. 1998), these studies did not directly quantify the nature of  
249 the drift. By taking advantage of the head direction drift in rat pups before eye-opening, we were  
250 able to quantify the drift in this system. This quantification has implications for the algorithm  
251 underlying the estimation of head direction. The fact that the drift power law we found in rats  
252 before eye-opening was not significantly different from the expected drift in a path integration  
253 process (Figure 2G), suggests that an integration process underlies the estimation of head  
254 direction. Moreover, this was the upper limit of drift without any correction mechanism, which  
255 suggests that in rat pups before eye-opening there is almost no correction mechanism, and the

256 system runs in practice in an open loop manner. The fact that this integration process occurs  
257 without the visual input suggests that a different source of input is being integrated, such as  
258 vestibular input. This extends adult studies showing the contribution of the vestibular system to  
259 the formation of head direction signal (Valerio & Taube 2016) by unraveling the nature of this  
260 vestibular contribution. The decrease in the drift after eye-opening implies an error correction  
261 mechanism that depends on the visual input.

262 Furthermore, a previous study suggested that the environment boundaries could be used as a  
263 mechanism for correcting the error accumulated in the grid cells code (Hardcastle et al. 2015).  
264 Our study suggests that the head direction code uses the information embedded in the  
265 geometrical shape of the environment to correct the accumulated error. The source of this error  
266 correction could come directly from salient geometric features in the environment such as walls  
267 and corners, or, from the border cells population that fire in an adult-like manner from the first  
268 days of exposure to an open environment (Bjerknes et al. 2014). Our data-set lacked a population  
269 of cells recorded in a square environment before eye-opening and so could not address the  
270 question whether the source of this correcting signal was visual or tactile. Future studies should  
271 address this question.

272 Computing the sense of direction instantaneously and accurately is vital for survival of  
273 humans and animals. Together, our findings support a vestibular path-integration algorithm that  
274 gives instantaneous sense of direction, but accumulates error over time. In addition, the  
275 environmental geometry, among other cues, helps to correct this accumulated error, and thus  
276 helps to compute the sense of direction accurately. We thus show here for the first time that the  
277 drift of the head-direction cells before eye-opening behaves like a Brownian-motion diffusion  
278 process. More generally, we provide here an example of how measuring the noise in a brain  
279 process, and not in the signal itself, can shed light on the computation performed by the brain.

280

## 281 **References**

282

- 283 Bjerknes, T.L. et al., 2015. Coherence among head direction cells before eye opening in rat pups. *Current*  
284 *Biology*, 25(1), pp.103–108. Available at: <http://dx.doi.org/10.1016/j.cub.2014.11.009>.
- 285 Bjerknes, T.L., Moser, E.I. & Moser, M.-B., 2014. Representation of Geometric Borders in the  
286 Developing Rat. *Neuron*, 82(1), pp.71–78. Available at:

- 287 <http://linkinghub.elsevier.com/retrieve/pii/S0896627314001123>.
- 288 Bonnevie, T. et al., 2013. Grid cells require excitatory drive from the hippocampus. *Nat Neurosci*, 16(3),  
289 pp.309–317. Available at: <http://dx.doi.org/10.1038/nn.3311>.
- 290 Chen, G. et al., 2016. Absence of Visual Input Results in the Disruption of Grid Cell Firing in the Mouse.  
291 *Curr. Biol.*, 26(17), pp.2335–2342. Available at: <http://www.ncbi.nlm.nih.gov/pubmed/27498565>.
- 292 Derdikman, D. et al., 2009. Fragmentation of grid cell maps in a multicompartiment environment. *Nat.*  
293 *Neurosci.*, 12(10), pp.1325–1332. Available at: <http://www.ncbi.nlm.nih.gov/pubmed/19749749>.
- 294 Finkelstein, A., Las, L. & Ulanovsky, N., 2016. 3-D Maps and Compasses in the Brain. *Annu. Rev.*  
295 *Neurosci.*, 39(1), pp.171–196. Available at: [http://www.annualreviews.org/doi/10.1146/annurev-](http://www.annualreviews.org/doi/10.1146/annurev-neuro-070815-013831)  
296 [neuro-070815-013831](http://www.annualreviews.org/doi/10.1146/annurev-neuro-070815-013831).
- 297 Goodridge, J.P. et al., 1998. Cue control and head direction cells. *Behav. Neurosci.*, 112(4), pp.749–761.  
298 Available at: <http://doi.apa.org/getdoi.cfm?doi=10.1037/0735-7044.112.4.749>.
- 299 Hardcastle, K., Ganguli, S. & Giocomo, L.M.M., 2015. Environmental Boundaries as an Error Correction  
300 Mechanism for Grid Cells. *Neuron*, 86(3), pp.827–839. Available at:  
301 <http://www.ncbi.nlm.nih.gov/pubmed/25892299>.
- 302 Muir, G.M. et al., 2009. Disruption of the head direction cell signal after occlusion of the semicircular  
303 canals in the freely moving chinchilla. *J. Neurosci.*, 29(46), pp.14521–14533. Available at:  
304 <http://www.ncbi.nlm.nih.gov/pubmed/19923286>.
- 305 Muller, M. & Wehner, R., 1988. Path Integration in desert ants, *Cataglyphis fortis*. *Proc Natl Acad Sci*,  
306 85(14), pp.5287–5290.
- 307 Ranck, J.B., 1985. Head direction cells in the deep cell layer of dorsal presubiculum in freely moving rats.  
308 In G. Buzsaki & C. H. Vanderwolf, eds. *Electr. Act. Arch.* Budapest: Akademiai Kiado, pp. 217–  
309 220.
- 310 Redish, A.D., Elga, A.N. & Touretzky, D.S., 1996. A coupled attractor model of the rodent head direction  
311 system. *Network-Computation Neural Syst.*, 7(4), pp.671–685.
- 312 Robertson, R.G. et al., 1999. Head direction cells in the primate pre-subiculum. *Hippocampus*, 9(3),  
313 pp.206–219.
- 314 Sargolini, F. et al., 2006. Conjunctive Representation of Position, Direction, and Velocity in Entorhinal  
315 Cortex. *Science (80-. )*, 312(5774), pp.758–762. Available at:  
316 <http://www.ncbi.nlm.nih.gov/pubmed/16675704>.
- 317 Seelig, J.D. & Jayaraman, V., 2015. Neural dynamics for landmark orientation and angular path  
318 integration. *Nature*, 521(7551), pp.186–191. Available at:  
319 <http://www.nature.com/doi/10.1038/nature14446>.
- 320 Skaggs, W.E. et al., 1995. A model of the neural basis of the rat's sense of direction. *Adv. Neural Inf.*  
321 *Process. Syst.*, 7, pp.173–180. Available at: <http://www.ncbi.nlm.nih.gov/pubmed/11539168>.
- 322 Stackman, R.W. & Taube, J.S., 1997. Firing properties of head direction cells in the rat anterior thalamic  
323 nucleus: Dependence on vestibular input. *J. Neurosci.*, 17(11), pp.4349–4358.
- 324 Tan, H.M. et al., 2015. The development of the head direction system before eye opening in the rat.  
325 *Current Biology*, 25(4), pp.479–483. Available at: <http://dx.doi.org/10.1016/j.cub.2014.12.030>.
- 326 Taube, J.S., Muller, R.U. & Ranck, J.B., 1990a. Head-direction cells recorded from the postsubiculum in

327 freely moving rats. I. Description and quantitative analysis. *The Journal of Neuroscience*, 10(2),  
328 pp.420–435. Available at: <http://www.jneurosci.org/content/10/2/420.abstract>.

329 Taube, J.S., Muller, R.U. & Ranck, J.B., 1990b. Head-direction cells recorded from the postsubiculum in  
330 freely moving rats. II. Effects of environmental manipulations. *J. Neurosci.*, 70(February). Available  
331 at: <http://www.jneurosci.org/content/10/2/436.short>.

332 Valerio, S. & Taube, J.S., 2016. Head Direction Cell Activity Is Absent in Mice without the Horizontal  
333 Semicircular Canals. *J. Neurosci.*, 36(3), pp.741–754. Available at:  
334 <http://www.jneurosci.org/cgi/doi/10.1523/JNEUROSCI.3790-14.2016>.

335 Zhang, K., 1996. Representation of spatial orientation by the intrinsic dynamics of the head-direction cell  
336 ensemble: a theory. *J. Neurosci.*, 16(6). Available at:  
337 [http://www.jneurosci.org/content/16/6/2112?ijkey=e30504a6f77b1a39880b7ba6dd2d87061ccae8a8](http://www.jneurosci.org/content/16/6/2112?ijkey=e30504a6f77b1a39880b7ba6dd2d87061ccae8a8%7B&%7Dkeytype2=tf%7B_%7Dipsecsha)  
338 [%7B&%7Dkeytype2=tf%7B\\_%7Dipsecsha](http://www.jneurosci.org/content/16/6/2112?ijkey=e30504a6f77b1a39880b7ba6dd2d87061ccae8a8%7B&%7Dkeytype2=tf%7B_%7Dipsecsha).

339  
340

341 **Figure 1 – Drift quantification results of simulated cells. A-D** are examples of simulated cells.  
342 Left column, in black is the head direction of the rat during the session. The red dots mark the  
343 rat's head direction while the cell fired spikes. Right column, is the probability function of  
344  $\log(\Delta HD)$  given  $\log(\Delta T)$ . The black line is the regression line (slope and intersection) fitted to  
345 all  $\log(\Delta T)$  values and the most probable  $\log(\Delta HD)$  values that correspond to them. **A**, an  
346 example of a simulated head direction cell with no drift. **B**, an example of a simulated non-head  
347 direction cell. **C**, an example of a simulated head direction with non-cyclic drift. **D**, an example  
348 of a head direction with cyclic drift. **E**, simulation of drifting population of cells in the cyclic  
349 method, for different drift values (degree/msec). x axis  $\epsilon$  – drift values, Left y axis is the median  
350 slope of the cells, Right y axis is the percentage of significant HD cells. **F**, simulation of drifting  
351 population of cells in the non-cyclic method for different drift values (degree/msec). x axis –  
352 drift values, Left y axis is the median slope of the cells, Right y axis is the percentage of  
353 significant HD cells. **G**, simulated population results. In blue are the median regression line  
354 slopes of all simulated cells (we used a drift value of  $\epsilon = 0.6$  (degree/msec)).

355 **Figure 2 – Drift quantification results of head direction cells in rat pups. A-E** Examples of 5  
356 recorded cells. Left column: the head direction tuning curve of the cell. Middle column: in black  
357 is the head direction of the rat during the session. The red dots mark the rat's head direction  
358 while the cell fired spikes. Right column: the probability distribution of  $\log(\Delta HD)$  given  $\log(\Delta T)$ .  
359 The black line is the regression line (slope and intersection) fitted to all  $\log(\Delta T)$  values and the  
360 most probable  $\log(\Delta HD)$  values that correspond to them. **A**, example of a head direction cell in

361 an adult rat. **B-D**, examples of drifting head direction cells in rat pups. **E**, example of a non-head  
362 direction cell. **F**, Quantification of drift in rats before eye-opening, after eye-opening and in  
363 adults. In blue are the median regression line slopes of cell populations recorded from rats before  
364 eye opening, after eye-opening and from adults. In red, black and green are the 1<sup>st</sup> median and  
365 99<sup>th</sup> percentile of a shuffle distribution, respectively. **G**, drift in rats before eye-opening, after  
366 eye-opening and simulation of cyclic drift (drift value used -  $\varepsilon = 0.6$  (degree/msec) ). N.S – not  
367 significant.

368

369 **Figure 3 – Environmental geometry affects the cell's drift.** **A**, Example for a cell recorded  
370 from a rat running in a circular arena. **B**, Example for a cell recorded from rat running in a  
371 square arena. Left column: the head direction tuning curve of the cell. Middle column: in black  
372 is the head direction of the rat during the session; red dots mark the rat's head direction while the  
373 cell fired spikes. Right column: the probability function of  $\log(\Delta HD)$  given  $\log(\Delta T)$ . The black  
374 line is the regression line (slope and intersection) fitted to all  $\log(\Delta T)$  values and the most  
375 probable  $\log(\Delta HD)$  values that correspond to them. **C**, The median log-slope of cells recorded  
376 from rats running in a square environment and the median log-slope of cells recorded from rats  
377 running in a circular environment.

378 **Figure S1 – Quantification of intersection parameter.** **A**, Simulated population results. Blue:  
379 the median regression line intersections of all simulated cells. **B**, Blue: the median regression line  
380 intersection of cell populations recorded from rats before eye opening, after eye-opening and  
381 adult. Red, black and green are the 1<sup>st</sup> percentile, the median, and the 99<sup>th</sup> percentile of the  
382 shuffle distribution, respectively. **C**, The median log-intersection of cells recorded from rats  
383 running in a square environment and the median log-intersection of cells recorded from rats  
384 running in a circular environment.

385

Figure 1

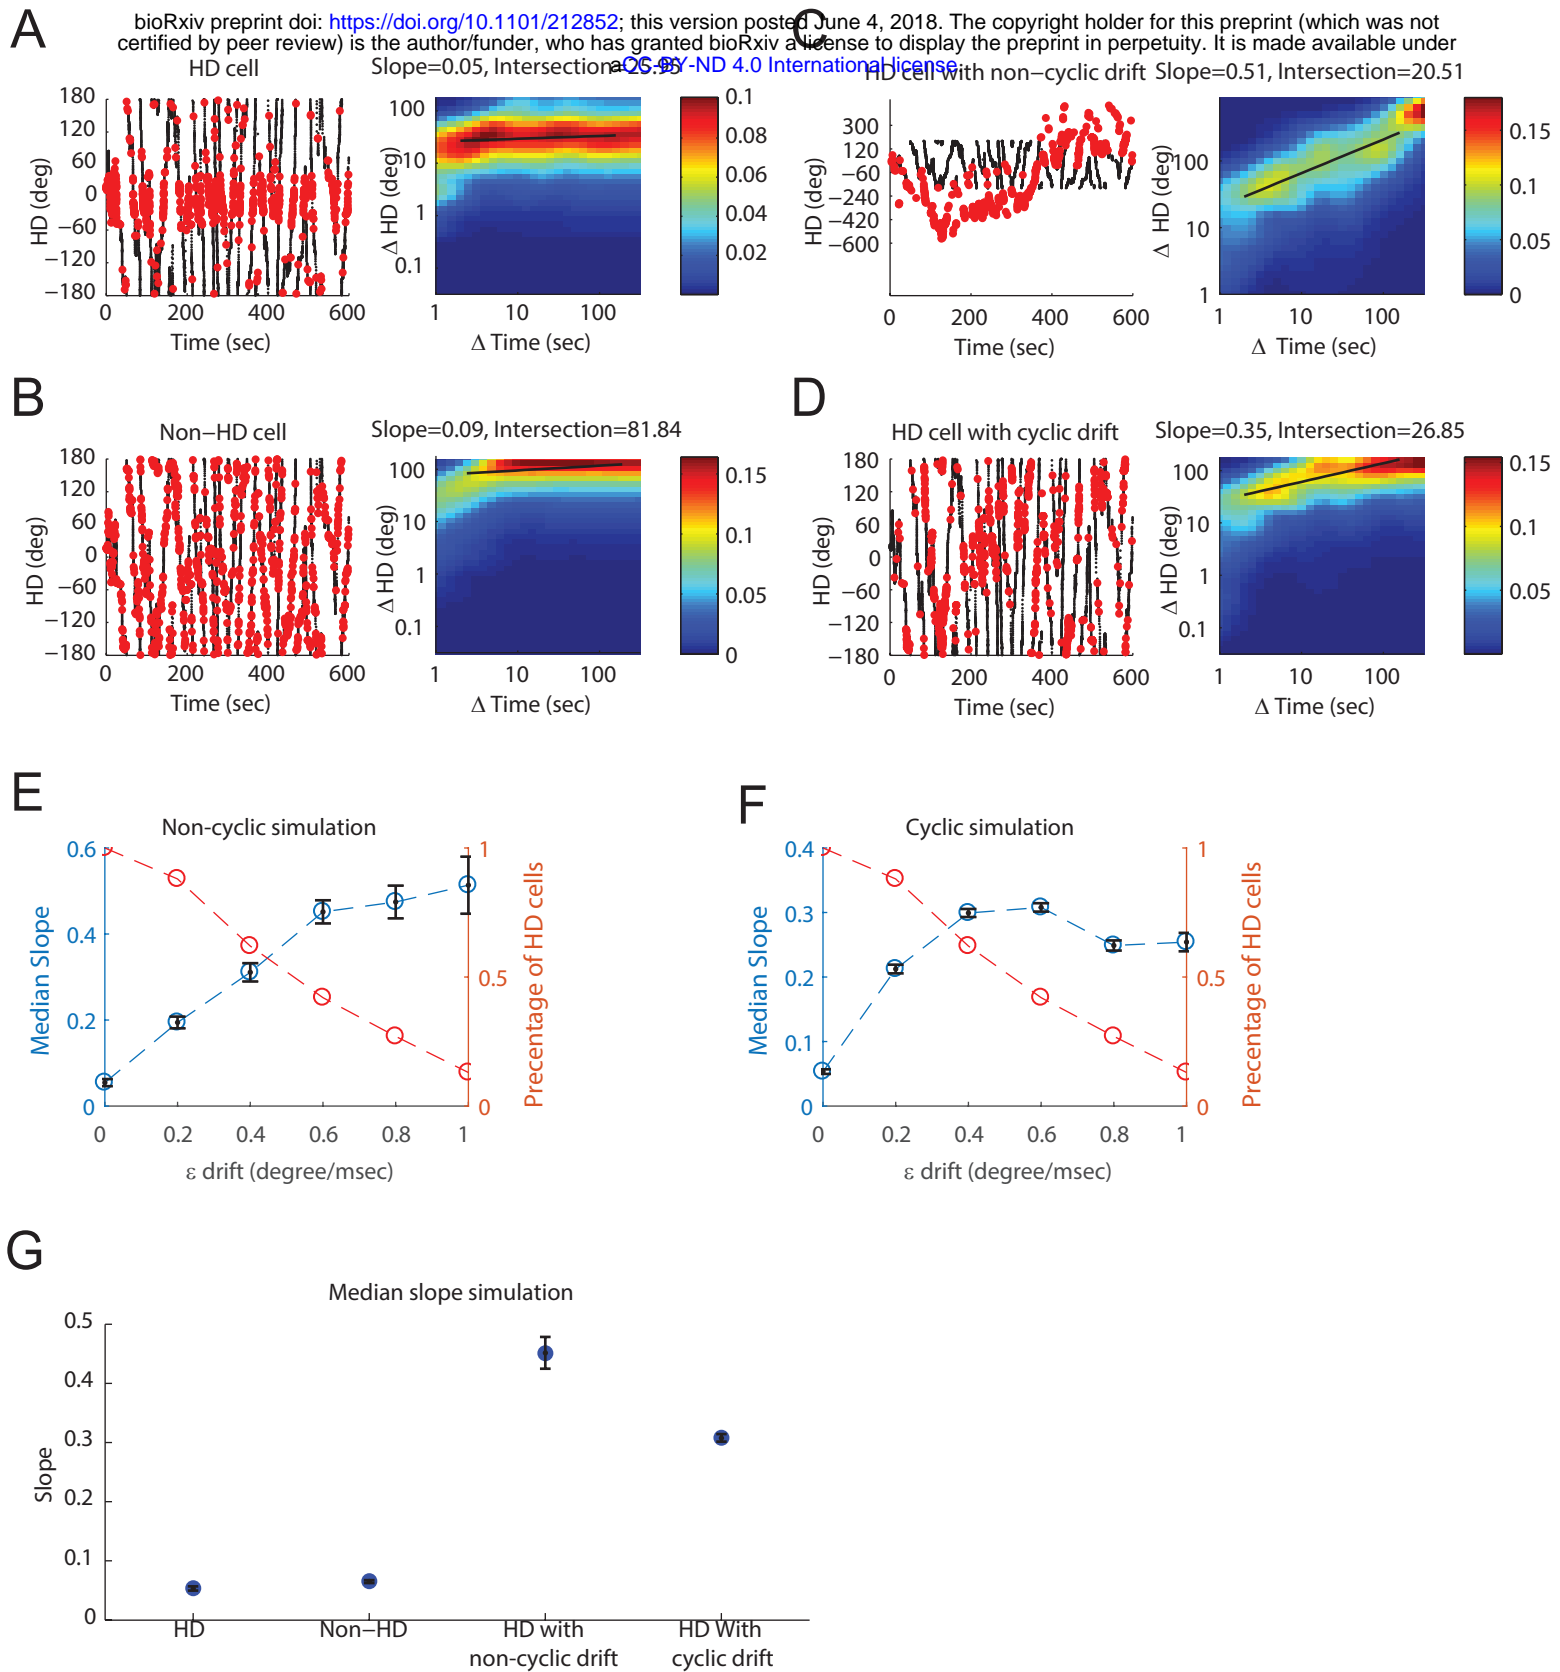

Figure 2

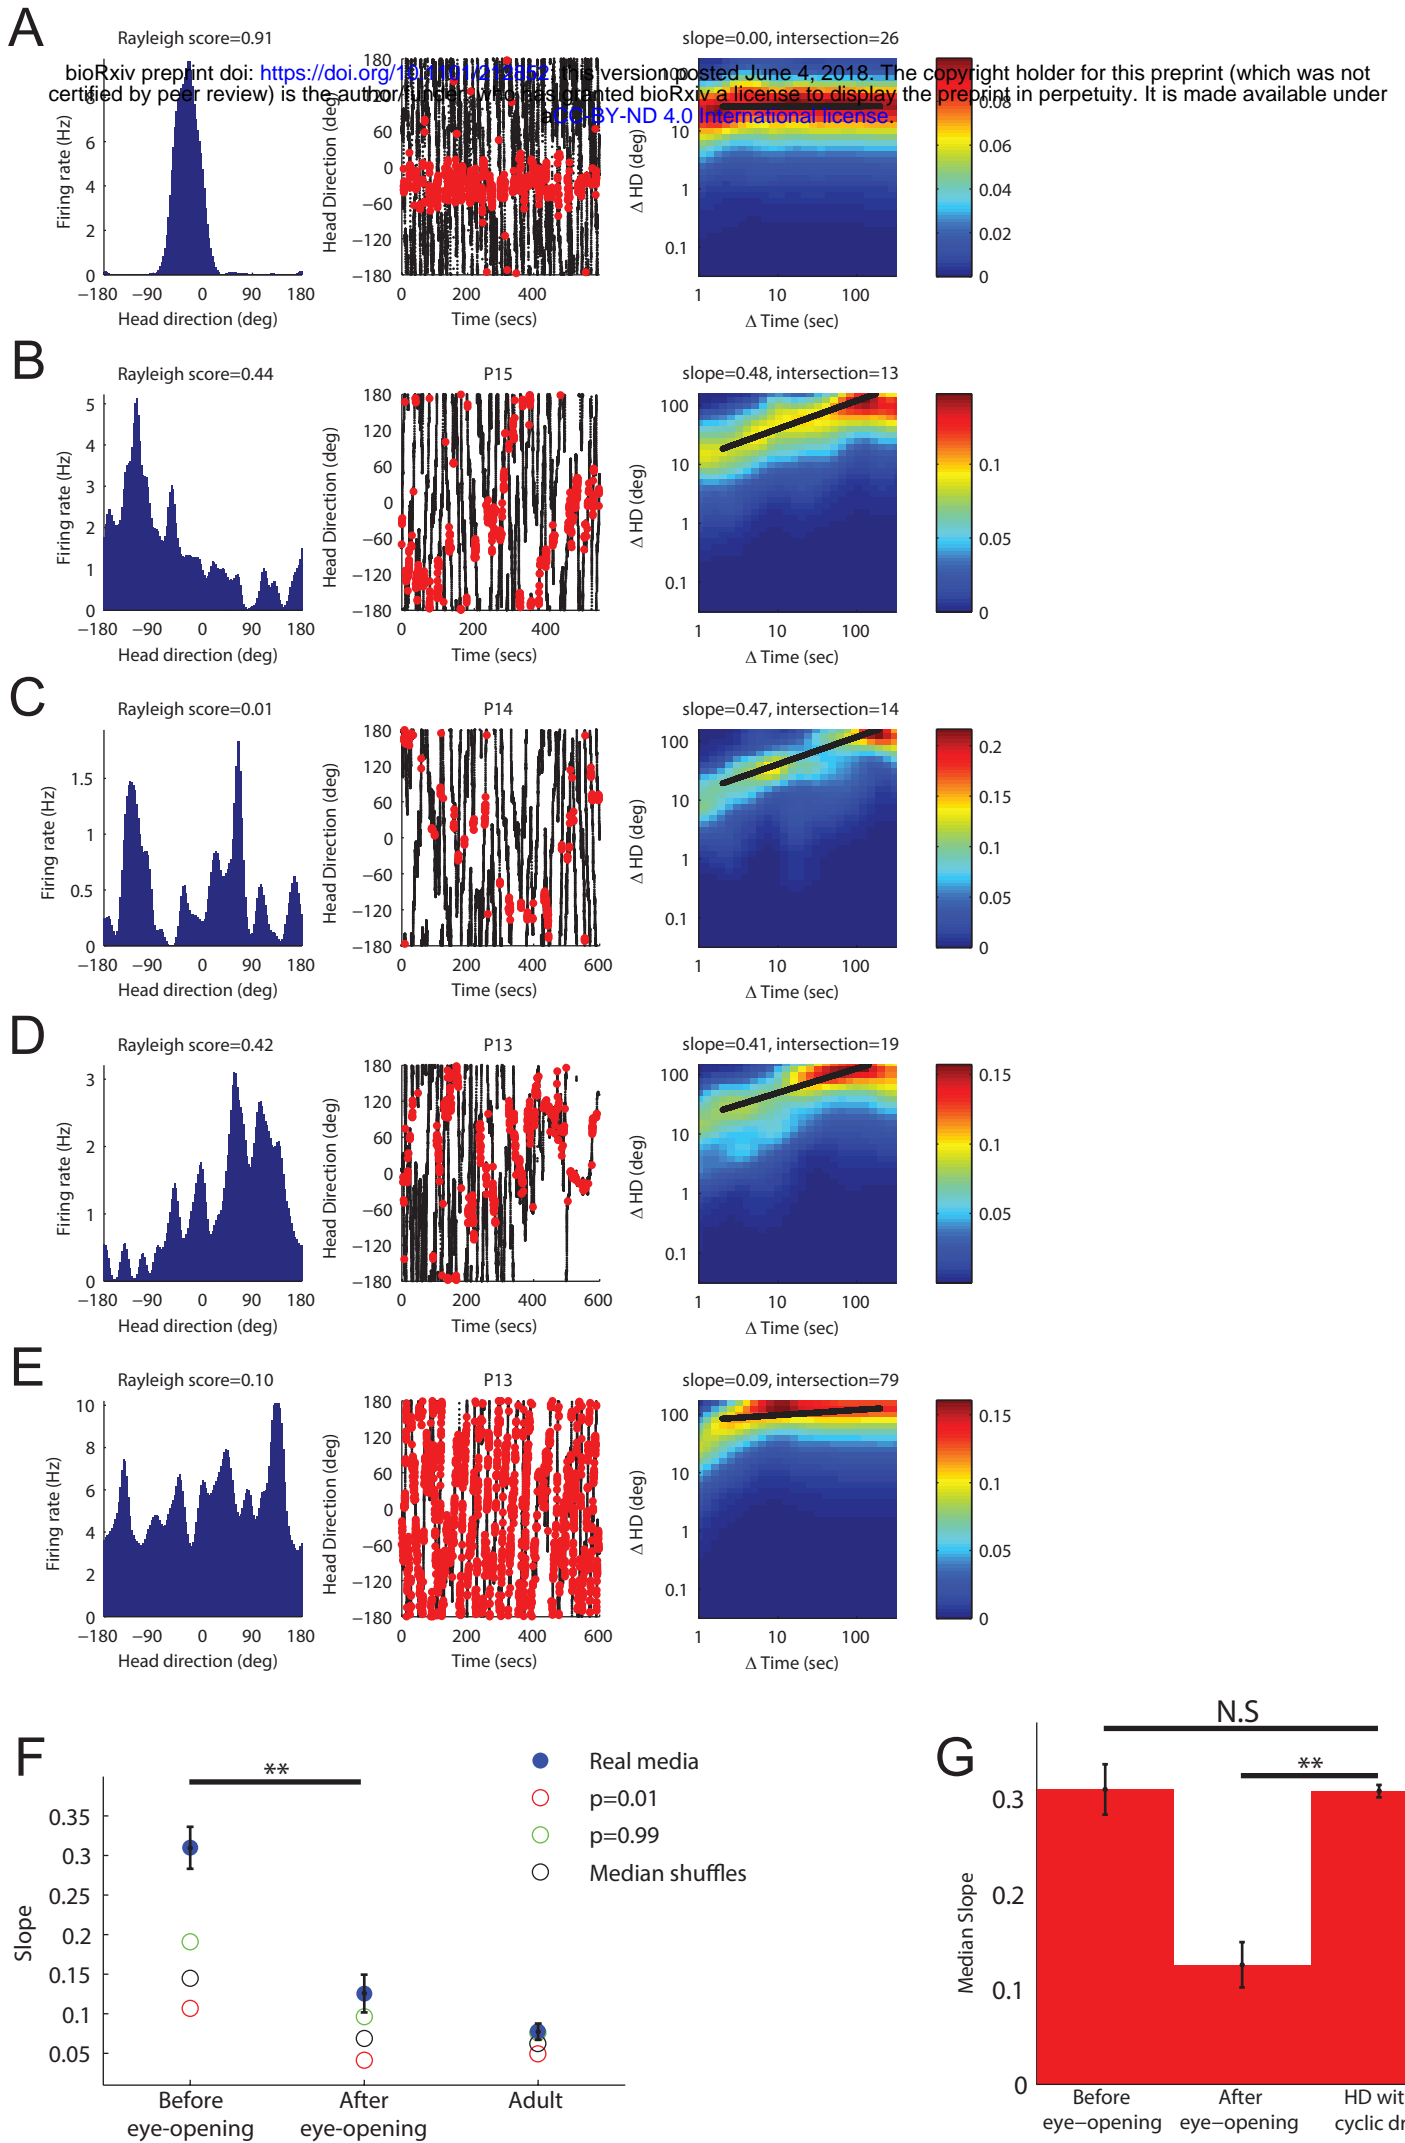

# Figure 3

bioRxiv preprint doi: <https://doi.org/10.1101/212852>; this version posted June 4, 2018. The copyright holder for this preprint (which was not certified by peer review) is the author/funder, who has granted bioRxiv a license to display the preprint in perpetuity. It is made available under aCC-BY-ND 4.0 International license.

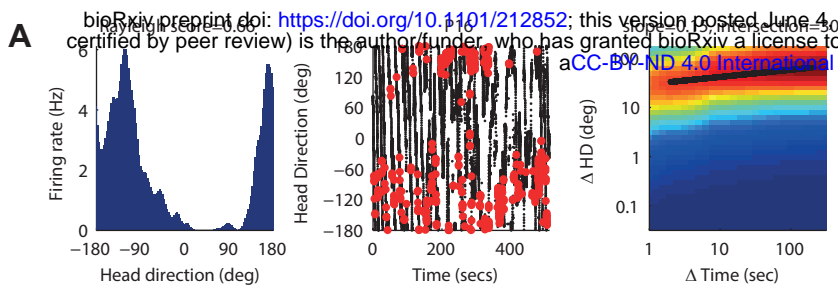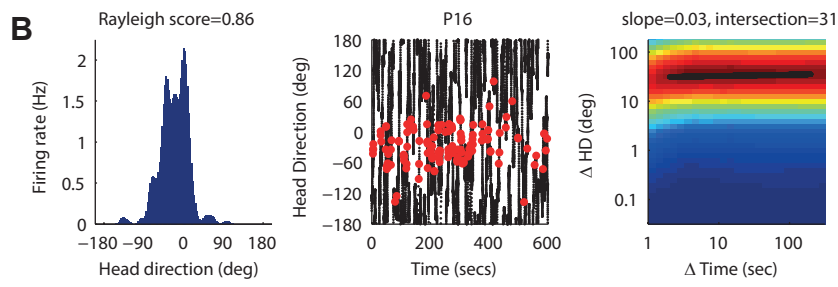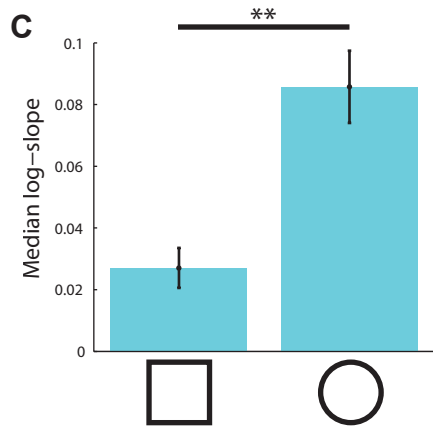



# Figure S1

bioRxiv preprint doi: <https://doi.org/10.1101/212852>; this version posted June 4, 2018. The copyright holder for this preprint (which was not certified by peer review) is the author/funder, who has granted bioRxiv a license to display the preprint in perpetuity. It is made available under aCC-BY-ND 4.0 International license.

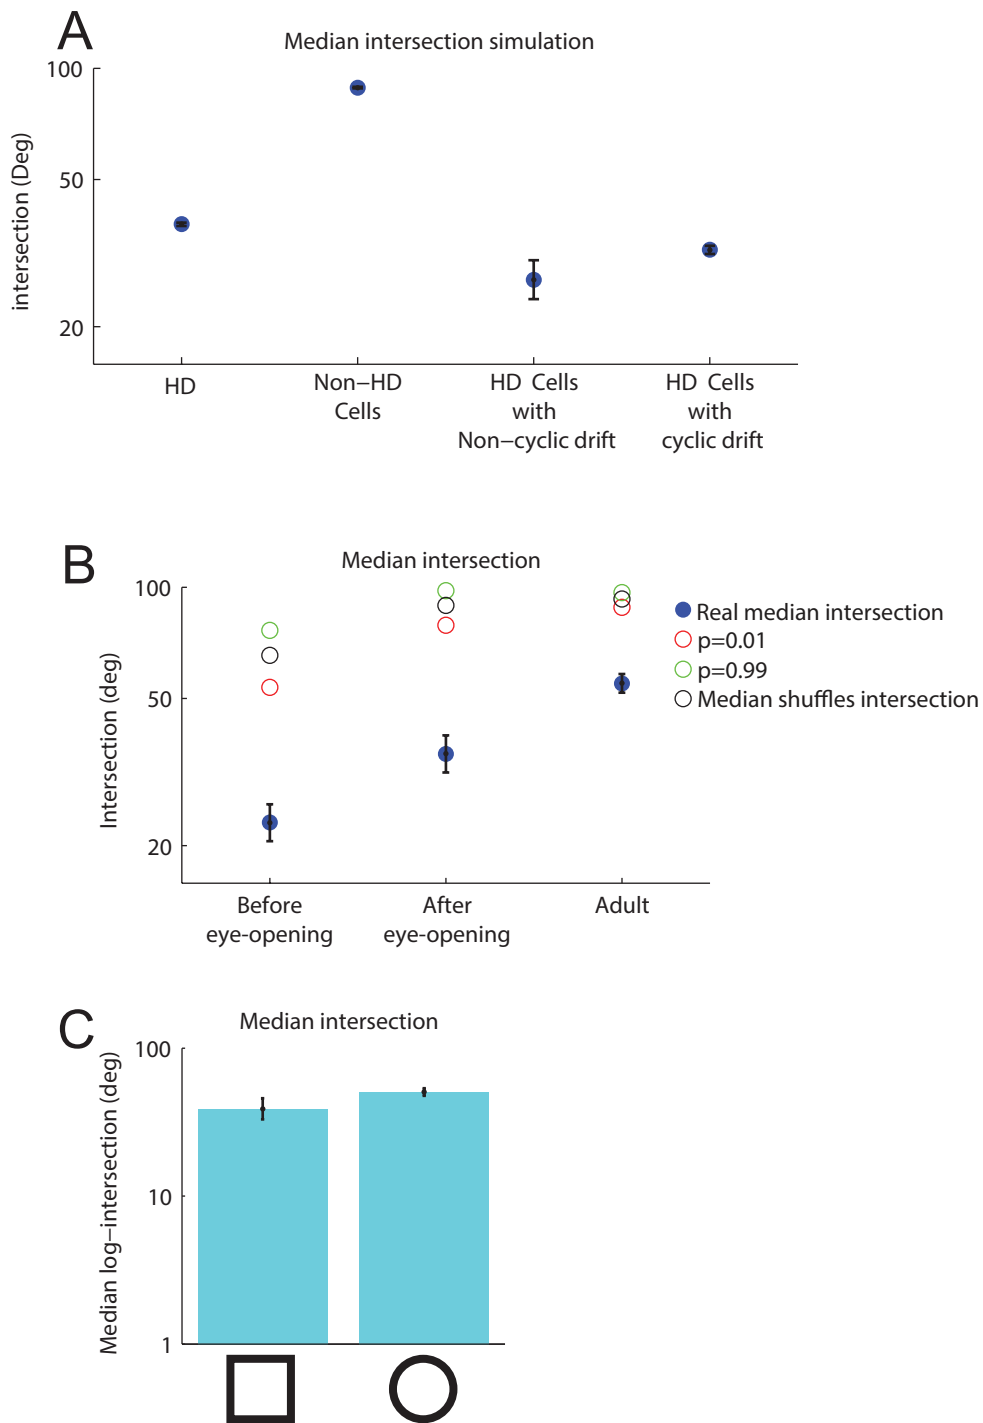

Source: http://biorxiv.org/content/10.1101/212852v2.full.pdf
